# Supplementary material for: Bioprocess development and scale-up for cis,cis-muconic acid production from glucose and xylose by Pseudomonas putida
Source: Royal Society of Chemistry journal article supplement (doi:10.1039/d4gc03424d), 2024-01-01
Supplement: d4gc03424d1.xlsx [file d4gc03424d1.xlsx]

## Sheet: Fig. 1
															Bioreactor runs: Batch
Shake Flasks experiments
															Batch: KH083_duplicate 1
LC224	OD₆₀₀			Muconic Acid (mM)			Residual Glucose (mM)			Residual Xylose (mM)					Time (h)	OD₆₀₀	Residual Glucose (g/L)	Residual Xylose (g/L)	Muconic acid (g/L)	Glucose Consumed (g/L)	Xylose Consumed (g/L)	MA yield (mol/mol)	MA yield(cmol/cmol)	Productivity (g/L/h)
Time	1	2	3	1	2	3	1	2	3	1	2	3			0	0.36	49.299	25.5959	0	0	0	0	0	0
0	0.167	0.167	0.167	0	0	0	29.11	29.11	29.11	15.28	15.28	15.28			2.5	0.24	49.6963	25.8124	0	0.00354359	0	0	0	0
19	1.438	1.426	1.418	11.02	10.3	10.53	6.12	7.41	6.74	8.77	9.2	8.99			7	0.29	50.019	25.9604	0.0151956	0.0882149	0.0551276	0.124793	0.134392	0.0021708
24.167	2.096	2.115	2.207	16.23	16.08	16	0	0	0	0.88	1.32	1.21			24	0.96	48.1128	25.3294	0.60328	2.40848	0.901071	0.219156	0.23109	0.0251367
48.5	1.96	1.952	1.956	17.29	17.17	17.03	0	0	0	0	0	0			27.5	1.51	47.5446	25.3174	1.15582	2.76878	0.805176	0.392313	0.409991	0.0420299
															31	2.01	45.8723	25.075	1.95322	4.85862	1.26434	0.38837	0.404409	0.063007
															48	7.5	24.516	18.0612	10.3142	23.4297	6.83212	0.413422	0.432089	0.21488
KH083	OD₆₀₀			Muconic Acid (mM)			Residual Glucose (mM)			Residual Xylose (mM)					51.5	8.7	17.2096	14.6168	14.7395	30.363	10.0827	0.440058	0.461999	0.286203
Time	1	2	3	1	2	3	1	2	3	1	2	3			55	9.7	12.2498	12.0827	15.72	34.9554	12.4262	0.399643	0.420605	0.285818
0	0.108	0.108	0.108	0	0	0	29.06	29.06	29.06	15.28	15.28	15.28			72	11	0	0	24.6207	44.621	23.1671	0.430986	0.460445	0.341955
19	1.639	1.528	1.612	12.2	11.01	12.89	0	3.21	1	8.77	9.2	8.99
24.167	1.64	1.677	1.709	15.29	15.43	15.39	0	0	0	0.88	1.32	1.21			Batch: KH083_duplicate 2
48.5	1.61	1.732	1.706	17.46	17.53	17.4	0	0	0	0	0	0			Time (h)	OD₆₀₀	Residual Glucose (g/L)	Residual Xylose (g/L)	Muconic acid (g/L)	Glucose Consumed (g/L)	Xylose Consumed (g/L)	MA yield (mol/mol)	MA yield(cmol/cmol)	Productivity (g/L/h)
															0	0.37	49.1697	25.5431	0	0	0	0	0	0
															2.5	0.22	48.7224	25.3085	0	0.847054	0.442293	0	0	0
KH099	OD₆₀₀			Muconic Acid (mM)			Residual Glucose (mM)			Residual Xylose (mM)					7	0.26	49.443	25.6865	0.0161754	0.532772	0.27534	0.0237566	0.0253754	0.00231077
Time	1	2	3	1	2	3	1	2	3	1	2	3			24	0.94	49.0164	25.7701	0.771296	1.37239	0.406347	0.5257	0.549719	0.0321373
0	0.107	0.107	0.107	0	0	0	29.07	29.07	29.07	15.28	15.28	15.28			27.5	1.5	47.3335	25.3392	1.23787	2.9514	0.783285	0.40328	0.420196	0.0450134
19	0.908	1.184	0.807	4.99	6.07	4.43	14.36	10.28	15.95	8.77	9.2	8.99			31	2.15	45.985	24.9806	1.95577	4.6129	1.30447	0.401312	0.419006	0.0630893
24.167	1.793	1.839	1.852	9.85	10.12	9.94	0	0	0	0.88	1.32	1.21			48	7.8	27.3462	18.5667	8.69375	20.1016	6.08188	0.402244	0.420931	0.18112
48.5	1.446	1.532	1.482	10.67	11.06	11.03	0	0	0	0	0	0			51.5	9.2	20.0479	15.6121	12.2605	27.0335	8.84618	0.412844	0.433202	0.238067
															55	10.5	15.3717	13.2032	15.0213	31.3489	11.0677	0.426689	0.448956	0.273115
	LC224			KH083			KH099								72	11.4	2.01565	1.42828	24.3534	42.4883	21.691	0.450597	0.481056	0.338242
	1	2	3	1	2	3	1	2	3
Productivity (g/L/h)	0.0506615	0.0503099	0.0498997	0.0511596	0.0513647	0.0509838	0.0312642	0.0324069	0.032319
Yield (cmol/cmol)	0.413208	0.41034	0.406994	0.41777	0.419445	0.416334	0.255243	0.264572	0.263855
															Batch: LC224_duplicate 1
															Time (h)	OD₆₀₀	Residual Glucose (g/L)	Residual Xylose (g/L)	Muconic acid (g/L)	Glucose Consumed (g/L)	Xylose Consumed (g/L)	MA yield (mol/mol)	MA yield(cmol/cmol)	Productivity (g/L/h)
															0	0.39	49.8553	26.1766	0	0	0	0	0	0
															3.5	0.35	49.355	25.8788	0.0227024	0.905703	0.510638	0	0.0203205	0.0064864
															7	0.26	47.9229	25.0634	0.0526275	2.74979	1.54234	0.014502	0.0155442	0.00751821
															24	1.89	44.8639	24.0538	1.31862	5.39678	2.33561	0.203874	0.216191	0.0549426
															27.5	3.03	41.9094	23.0175	2.12711	8.35129	3.3719	0.217512	0.230025	0.0773493
															31	4.22	39.322	22.319	3.39713	10.7352	3.96356	0.278003	0.292997	0.109585
															48	10.3	14.9244	11.4699	13.8624	31.5572	12.9354	0.373281	0.394986	0.2888
															51.5	10.4	10.5746	8.65401	15.8031	35.5602	15.5691	0.369341	0.391834	0.306856
															55	11	7.11421	6.04007	17.8335	38.6789	18.0036	0.375035	0.398859	0.324246
															72	11.2	0	0	23.7924	44.7976	23.521	0.413057	0.441499	0.33045
															Batch: LC224_duplicate 2
															Time (h)	OD₆₀₀	Residual Glucose (g/L)	Residual Xylose (g/L)	Muconic acid (g/L)	Glucose Consumed (g/L)	Xylose Consumed (g/L)	MA yield (mol/mol)	MA yield(cmol/cmol)	Productivity (g/L/h)
															0	0.33	49.1321	25.8012	0	0	0	0	0	0
															3.5	0.27	46.5214	24.3968	0.0204137	3.01016	1.61415	0.00523115	0.00559635	0.00583248
															7	0.37	47.8504	25.0292	0.0500424	2.08723	1.19493	0.0180171	0.019329	0.00714892
															24	2.04	43.9127	23.5712	1.30406	5.61886	2.43979	0.193435	0.205148	0.0543359
															27.5	3.21	41.9005	22.9791	2.1656	7.63107	3.03184	0.24362	0.257474	0.078749
															31	4.21	38.0597	21.6025	3.27178	11.2714	4.30313	0.252372	0.266318	0.105541
															48	10.5	14.4461	11.1217	14.0461	31.0194	12.754	0.384396	0.406796	0.292628
															51.5	11.6	9.91381	8.24178	16.1741	35.0484	15.3696	0.38332	0.406691	0.31406
															55	11.8	6.32283	5.57294	18.2288	38.1471	17.78	0.388503	0.413205	0.331432
															72	10.4	0	0	22.9861	43.517	22.8525	0.410775	0.439063	0.319251

## Sheet: Fig. 2
		Shake Flask experiments: Effect of Initial Sugar Concentration
	Bacterial Growth (OD600)
		0% CSL										10% CSL
	Initial Concentration	15 g/L		75 g/L		100 g/L		125 g/L				15 g/L		75 g/L		100 g/L		125 g/L
	Time (h)	OD₆₀₀ (1)	OD₆₀₀ (2)	OD₆₀₀ (1)	OD₆₀₀ (2)	OD₆₀₀ (1)	OD₆₀₀ (2)	OD₆₀₀ (1)	OD₆₀₀ (2)		Time (h)	OD₆₀₀ (1)	OD₆₀₀ (2)	OD₆₀₀ (1)	OD₆₀₀ (2)	OD₆₀₀ (1)	OD₆₀₀ (2)	OD₆₀₀ (1)	OD₆₀₀ (2)
	0	0.18	0.23	0.16	0.18	0.16	0.15	0.17	0.22		0	0.41	0.41	0.43	0.36	0.35	0.4	0.37	0.4
	2.8	0.14	0.2	0.17	0.15	0.15	0.14	0.2	0.2		2.8	1.45	1.2	1.01	0.79	0.61	0.6	0.48	0.39
	5.3	0.24	0.26	0.19	0.2	0.2	0.2	0.19	0.25		5.3	5.41	3.95	3.74	2.94	2.48	2.24	0.98	0.7
	7.8	0.34	0.29	0.2	0.25	0.23	0.21	0.21	0.24		7.8	6.35	5.26	6.46	5.59	4.92	3.91	1.94	1.75
	11	0.48	0.42	0.2	0.29	0.25	0.22	0.2	0.21		11	7.27	6.23	7.06	6.53	6.18	6.09	3.9	3.16
	24.3	3.55	3.85	1.81	1.89	0.77	0.85	0.34	0.31		24.3	9.9	9.37	10.6	10.3	9.97	9.87	8.1	7.55
	30.3	3.84	3.94	2.79	2.74	1.21	1.45	0.38	0.38		30.3	10.2	10.8	10.8	10.4	10.4	10.2	8.7	8.9
	47.9			3.76	4.36	3.92	4.17	1.8	1.69		47.9							13.1	13
	Sugar Utilization
		0% CSL										10% CSL
	Initial Concentration	15 g/L		75 g/L		100 g/L		125 g/L			Initial Concentration	15 g/L		75 g/L		100 g/L		125 g/L
		1	2	1	2	1	2	1	2			1	2	1	2	1	2	1	2
	Glucose utilized (g/L)	9.18	8.55	5.87	5.32	1.35	2.39	0.01	0.93		Glucose utilized (g/L)	8.79	8.91	17.02	12.89	17.45	13.73	12.01	11.9
	Xylose Utilized (g/L)	2.84	2.86	1.23	1.2	0.07	0.52	0.12	0.04		Xylose Utilized (g/L)	4.32	4.79	11.42	9.81	12.69	11.24	11.49	8.81
	Productivity
		0% CSL										10% CSL
	Initial Concentration	15 g/L		75 g/L		100 g/L		125 g/L			Initial Concentration	15 g/L		75 g/L		100 g/L		125 g/L
		1	2	1	2	1	2	1	2			1	2	1	2	1	2	1	2
	Prouctivity (g/L/h)	0.143266	0.131623	0.0941293	0.102484	0.0298801	0.0318371	0.00585827	0.00383359		Prouctivity (g/L/h)	0.199383	0.147939	0.238954	0.264214	0.26276	0.253923	0.1559	0.188674
	Yield										Yield
		0% CSL										10% CSL
	Initial Concentration	15 g/L		75 g/L		100 g/L		125 g/L			Initial Concentration	15 g/L		75 g/L		100 g/L		125 g/L
		1	2	1	2	1	2	1	2			1	2	1	2	1	2	1	2
	Yield (C-mol/C-mol)	0.393996	0.382417	0.24457	0.254661	0.0815169	0.0801073	0.0240356	0.00872631		Yield (C-mol/C-mol)	0.200916	0.175178	0.168096	0.205882	0.167249	0.179232	0.111534	0.149932
	Muconate										Muconate
		0% CSL										10% CSL
	Initial Concentration	15 g/L		75 g/L		100 g/L		125 g/L			Initial Concentration	15 g/L		75 g/L		100 g/L		125 g/L
		1	2	1	2	1	2	1	2			1	2	1	2	1	2	1	2
	Muconate (g/L)	4.33381	3.98159	2.4317	2.23359	0.903872	0.963073	0.115966	0.177213		Muconate (g/L)	5.12739	4.47515	7.22836	7.99247	7.94849	7.68116	4.71598	5.70738

## Sheet: Fig. 3
	Pulsed fed-batch: KH083_duplicate 1_10% CSL
	Time (h)	OD₆₀₀	Residual Glucose (g/L)	Residual Xylose (g/L)	Muconic acid (g/L)	Glucose Consumed (g/L)	Xylose Consumed (g/L)	MA yield (mol/mol)	MA yield(cmol/cmol)	Productivity (g/L/h)
	0	0.38	58.9393	29.1598	0	0	0	0	0	#DIV/0!
	6	2.8	59.2278	29.205	0.104988	0.190648	0.19183	0	0.00855213	0.016879
	23	12.6	39.4187	20.6491	7.88763	15.9485	6.74341	0.399487	0.286214	0.411595
	26.5	16.3	25.3357	16.2998	12.9986	29.0024	10.5836	0.411392	0.325114	0.509881
	31	18.9	13.9861	12.0153	18.6123	38.9739	14.1862	0.415829	0.352972	0.588061
	31.25	18.9	41.1485	23.7527	16.8361	36.1589	14.9192	0.383755	0.323006	0.518119
	47.5	18.7	21.1095	11.4927	27.3814	51.0126	24.5854	0.39917	0.36862	0.568515
	50.5	17.5	18.1921	9.44898	29.5572	54.1506	26.7394	0.418382	0.390241	0.604447
	54.5	17.9	10.6553	7.89056	30.1553	61.0296	27.9689	0.440339	0.413102	0.609096
	55	17.9	33.1711	18.4793	28.4212	57.6487	27.1752	0.415928	0.388465	0.551824
	69	17	28.3985	12.2088	32.0339	61.1772	32.8202	0.424706	0.402899	0.489032
	78	17	26.2395	9.1419	33.5035	62.3653	35.399	0.43078	0.411993	0.463998
	Pulsed fed-batch: KH083_duplicate 2_10% CSL
	Time (h)	OD₆₀₀	Residual Glucose (g/L)	Residual Xylose (g/L)	Muconic acid (g/L)	Glucose Consumed (g/L)	Xylose Consumed (g/L)	MA yield (mol/mol)	MA yield(cmol/cmol)	Productivity (g/L/h)
	0	0.39	58.3789	28.8725	0	0	0	0	#DIV/0!	#DIV/0!
	6	2.8	58.6073	28.9212	0.101274	0.246192	0.186028	0	0.00889521	0.017498
	23	13.3	34.4652	18.7927	9.46668	20.1686	8.22768	0.415941	0.275634	0.34294
	26.5	16	24.8995	15.4944	13.5118	28.5247	10.9277	0.39515	0.311393	0.490512
	31	18.1	13.6051	11.0097	18.2299	38.1019	14.5631	0.42137	0.356668	0.600396
	31.25	18.1	40.3941	22.926	16.1912	35.4674	15.0172	0.394804	0.331881	0.538757
	47.5	17.7	17.8089	9.59084	27.0044	54.1087	26.3798	0.431131	0.394711	0.576451
	50.5	17.4	14.1584	7.32033	30.5246	57.9798	28.7606	0.434506	0.40173	0.585292
	54.5	17.9	11.9544	5.71458	33.1957	59.526	30.0373	0.404146	0.377497	0.553308
	55	17.9	34.3543	15.4367	30.3503	56.3314	30.1465	0.399193	0.370084	0.51675
	69	15.5	29.9375	10.2795	33.7432	59.2574	34.5544	0.403839	0.381822	0.46426
	78	14.9	25.9503	7.48895	36.1918	62.2778	36.859	0.405113	0.386149	0.429532
	Continuous fed-batch: KH083_duplicate 1_10% CSL
	Time (h)	OD₆₀₀	Residual Glucose (g/L)	Residual Xylose (g/L)	Muconic acid (g/L)	Glucose Consumed (g/L)	Xylose Consumed (g/L)	MA yield (mol/mol)	MA yield(cmol/cmol)	Productivity (g/L/h)
	0	0.38	9.26673	4.60299	0	0	0.00118293	0	0	0
	6	7.3	9.20499	4.38889	0.297676	0.103164	0.252714	0.928527	0.0252658	0.0496126
	23	17.8	2.43778	5.89416	15.3742	36.8871	14.053	0.36261	0.306157	0.668445
	26.5	18.8	3.66059	6.01077	19.6916	39.5024	15.8941	0.426183	0.368301	0.743078
	31	18.8	7.97743	7.10298	23.5959	42.9663	18.7672	0.456784	0.404494	0.761157
	47.5	17.6	25.2807	11.6165	29.8949	49.2296	26.2619	0.469372	0.433279	0.629366
	50.5	17.8	27.0583	11.7829	31.2834	46.7874	25.7571	0.510441	0.469401	0.619473
	54.5	16.4	27.7885	11.4497	34.1936	47.6507	26.9024	0.542308	0.50134	0.627406
	69	15.7	28.0126	9.79172	36.782	52.9376	31.3689	0.514792	0.485258	0.533073
	78	17.4	25.9708	8.8272	38.9006	55.4017	32.5502	0.52207	0.495557	0.498725
	Continuous fed-batch: KH083_duplicate 2_10% CSL
	Time (h)	OD₆₀₀	Residual Glucose (g/L)	Residual Xylose (g/L)	Muconic acid (g/L)	Glucose Consumed (g/L)	Xylose Consumed (g/L)	MA yield (mol/mol)	MA yield(cmol/cmol)	Productivity (g/L/h)
	0	0.35	9.57318	4.75888	0	0	0	0	0	0
	6	7.3	9.57557	4.65672	0.221428	0	0	0	0.0196334	0.0369047
	23	16.7	2.83383	5.95777	13.4107	34.1763	12.812	0.34311	0.286079	0.583076
	26.5	19	2.29434	5.95198	18.9539	38.7446	14.8709	0.424611	0.364172	0.71524
	31	20.5	4.94019	6.54319	23.2858	44.7137	18.6699	0.439831	0.390532	0.751156
	47.5	30	0.115103	6.0236	32.1643	69.5873	29.4077	0.3888	0.368572	0.677143

## Sheet: Fig. 4
	Continuous Fed batch: Effect of CSL composition
		Bacterial Growth (OD600)								Glucose Utilized (g/L)								Xylose Utilized (g/L)
		0% CSL		1% CSL		5% CSL				0% CSL		1% CSL		5% CSL				0% CSL		1% CSL		5% CSL
	Time (h)	OD₆₀₀ (1)	OD₆₀₀ (2)	OD₆₀₀ (1)	OD₆₀₀ (2)	OD₆₀₀ (1)	OD₆₀₀ (2)		Time (h)	1	2	1	2	1	2		Time (h)	1	2	1	2	1	2
	0	0.13	0.18	0.27	0.23	0.3	0.34		0	0	0	0	0	0	0		0	0	0	0	0	0	0
	3.2	0.19	0.17	1.29	1.35	3.95	3.9		3.2	0	0.08	0.21	0.35	0.08	0.04		3.2	0.04	0.04	0.13	0.21	0.04	0.09
	6.7	0.26	0.23	1.46	1.58	5.6	5.1		6.7	0	0.67	1.08	1.16	1.54	1.42		6.7	0.16	0.29	0.39	0.45	0.69	0.71
	23.7	3.3	3.5	9.2	8.5	15.3	15.7		23.7	8.54	5.02	19.81	18.33	33.12	34.61		23.7	0	0.25	5.09	5.11	9.5	10.25
	27.4	5.3	5.8	11.5	10.8	17	17.8		27.4	16.43	11.83	28.67	26.05	41.97	41.61		27.4	0	3.05	8.66	8.4	13.88	13.73
	30.7	7.1	6.8	12.7	12.4	17.6	17.4		30.7	19.84	16.75	35.48	32.2	46.06	47.11		30.7	5.44	3.79	11.77	11.31	16.36	17.37
	47.7	10.9	10.8	13	16.6	19	16.5		47.7	36.02	33.57	46.76	44.59	53.65	54.56		47.7	15.14	13.74	23.23	22.68	25.67	26.81
	51.5	10.4	10.5	12.7	12.1	21	16		51.5	37.16	36.5	48.14	45.64	55.01	55.07		51.5	16.82	16.12	25.06	24.46	26.92	27.88
	54.8	11.1	10.3	12.3	12.3	20.4	15.3		54.8	40.3	38.73	49.8	47.41	56.58	56.48		54.8	19.21	18.26	26.75	26.19	28.27	29.21
	71.4	10.8	10.9	11.3	11.2	20.1			71.4	46.63	43.4	54.78	52.35	64.99			71.4	25.9	24.21	32.52	31.78	34
	75.4	10.5	10.6	11.6	11.2	16.9			75.4	47.84	44.34	55.91	53.5	66.52			75.4	26.96	25.33	33.55	33.01	34.76
	78.5	10.8	10.8	11.8	12.1	20.7			78.5	48.62	45.56	57.19	54.02	68.8			78.5	27.77	26.23	34.38	33.74	35.7
	97	11.2	10.6	11.4	11.4	17.7			97	51.96	47.6	58.98	57.01	72.48			97	30.26	28.75	36.66	35.97	36.51
		Muconate production (g/L)								Productivity (g/L/h)								Yield (cmol/cmol)
		0% CSL		1% CSL		5% CSL				0% CSL		1% CSL		5% CSL				0% CSL		1% CSL		5% CSL
	Time (h)	1	2	1	2	1	2		Time (h)	1	2	1	2	1	2		Time (h)	1	2	1	2	1	2
	0	0.03	0	0	0	0	0		0	0	0	0	0	0	0		0	0	0	0	0	0	0
	3.2	0.03	0.03	0.11	0.11	0.12	0.12		3.2	0.01	0.01	0.03	0.03	0.04	0.04		3.2	0	0	0.0746892	0.0692515	1.26699	1.16989
	6.7	0.08	0.07	0.44	0.47	0.84	0.94		6.7	0.01	0.01	0.07	0.07	0.13	0.14		6.7	0	0.1655	0.192104	0.195214	0.477242	0.559141
	23.7	3.21	3.08	9.96	9.42	16.44	17.14		23.7	0.14	0.13	0.42	0.4	0.69	0.72		23.7	0.53926	0.54	0.504964	0.506317	0.488675	0.484045
	27.4	5.17	5.14	14.2	13.15	21.86	21.98		27.4	0.19	0.19	0.52	0.48	0.8	0.8		27.4	0.424661	0.476012	0.480582	0.481954	0.495871	0.503187
	30.7	7.88	7.76	16.86	16.2	23.86	24.03		30.7	0.26	0.25	0.55	0.53	0.78	0.78		30.7	0.419177	0.508646	0.451021	0.470303	0.484276	0.472148
	47.7	17.44	16.16	26.45	25.65	31.93	34.32		47.7	0.37	0.34	0.55	0.54	0.67	0.72		47.7	0.447491	0.447776	0.480096	0.483985	0.510018	0.534386
	51.5	20.15	18.19	27.01	26.86	31.46	32.36		51.5	0.39	0.35	0.52	0.52	0.61	0.63		51.5	0.489095	0.451706	0.468757	0.486422	0.486505	0.494272
	54.8	21.02	18.65	29.36	27.97	32.51	33.96		54.8	0.38	0.34	0.54	0.51	0.59			54.8	0.461505	0.426581	0.487113	0.482314	0.485443	0.502127
	71.4	26.75	29.77	33.57	33.38	39.93			71.4	0.37	0.42	0.47	0.47	0.56			71.4	0.479338	0.571613	0.488342	0.503561	0.511075
	75.4	27.16	25.79	34.9	33.63	41.87			75.4	0.36	0.34	0.46	0.45	0.56			75.4	0.471634	0.480344	0.495484	0.49332	0.523789
	78.5	27.6	26.34	34.86	34.79	44.74			78.5	0.35	0.34	0.44	0.44	0.57			78.5	0.469152	0.475751	0.483504	0.503146	0.542445
	97	30.78	29.95	40.14	37.83	47.2			97	0.32	0.31	0.41	0.39	0.49			97	0.485082	0.507892	0.532868	0.516147	0.548693

## Sheet: Fig. 5
		Fed-Batch Corn Stover Hydrolysate: duplicate 1
		Time (h)	OD₆₀₀	Residual Glucose (g/L)	Residual Xylose (g/L)	Muconic acid (g/L)	Glucose Consumed (g/L)	Xylose Consumed (g/L)	MA yield (mol/mol)	MA yield(cmol/cmol)	Productivity (g/L/h)
		0	0.25	9.25661	5.88971	0	0	0	0	0	0
		7.83333	5.57	7.89677	5.15775	0.807799	1.43359	0	0.43242	0.107781	0.103123
		23.5	17.2	24.8055	25.7121	12.1559	29.5992	7.9073	0.394254	0.34624	0.517272
		26	21.3	21.7943	24.6884	14.116	34.0623	9.82297	0.390305	0.35166	0.542922
		29.5	21.3	17.093	20.7874	16.4777	38.588	13.6154	0.380317	0.352954	0.558566
		46	20.2	26.0525	20.3261	23.8362	47.3	24.9313	0.391336	0.381769	0.518178
		49.5	22.3	26.6716	19.3832	24.5013	47.6696	26.4811	0.390969	0.383216	0.494976
		53.5	20	24.9889	17.2966	26.4982	49.3522	28.5677	0.401666	0.396032	0.495293
		71	21.9	29.1002	15.7552	30.4919	52.3712	34.4876	0.4123	0.412546	0.429463
		74.25	19.4	29.5495	15.4547	31.6634	53.2325	35.594	0.418372	0.419495	0.426442
		77.5	20.2	28.6438	14.3776	34.0533	54.3613	36.8087	0.438139	0.44029	0.439397
		98.25	17.5	23.549	9.20552	36.8346	58.7903	41.5701	0.429692	0.435661	0.374907
		Fed-Batch Corn Stover Hydrolysate: duplicate 2
		Time (h)	OD₆₀₀	Residual Glucose (g/L)	Residual Xylose (g/L)	Muconic acid (g/L)	Glucose Consumed (g/L)	Xylose Consumed (g/L)	MA yield (mol/mol)	MA yield(cmol/cmol)	Productivity (g/L/h)
		0	0.26	9.16423	5.82182	0	0	0	0	0	0
		7.83333	5.45	7.663	5.15908	0.823232	1.57425	0.709129	0.430332	0.457062	0.105093
		23.5	15.7	20.5933	23.4307	13.2267	33.7372	10.1342	0.36533	0.382209	0.562837
		26	15.8	18.3279	22.9761	14.3594	37.455	11.481	0.355323	0.371996	0.552283
		29.5	19.8	14.0298	19.4599	16.5784	41.5776	14.8889	0.353559	0.372205	0.561978
		46	18.5	23.1326	19.1821	23.0756	48.1201	24.7751	0.375771	0.401314	0.501643
		49.5	20.7	23.9014	18.5093	24.6829	48.5562	26.1882	0.39123	0.418646	0.498644
		53.5	19.6	22.5465	16.5825	24.927	49.9112	28.115	0.377779	0.405004	0.465925
		71	20.4	26.5394	15.7487	27.8017	53.1204	33.372	0.378303	0.407496	0.391573
		74.25	17.3	26.9385	15.3671	28.9229	53.8168	34.4268	0.385442	0.415517	0.389534
		77.5	18.4	26.0847	14.2012	29.198	54.6706	35.5927	0.380106	0.410083	0.376749
		98.25	17.3	21.4394	9.60726	30.4012	58.6733	39.7904	0.362151	0.391421	0.309427
		Fed-Batch Mock Hdrolysate: duplicate 1
		Time (h)	OD₆₀₀	Residual Glucose (g/L)	Residual Xylose (g/L)	Muconic acid (g/L)	Glucose Consumed (g/L)	Xylose Consumed (g/L)	MA yield (mol/mol)	MA yield(cmol/cmol)	Productivity (g/L/h)
		0	0.233333	8.67808	5.50833	0	0	0	0	0	0
		4	3.32333	8.54286	5.43386	0.0909391	0.204374	0	0.332807	0.015146	0.0227348
		8	5.5	7.25973	4.69282	0.933633	1.55777	0.903999	0.447899	0.120662	0.116704
		14.65	10.8333	2.85678	4.91825	5.46859	12.3166	4.58996	0.388945	0.286547	0.373283
		23.5	19.1	0	7.79356	16.2649	31.843	11.9718	0.446225	0.405159	0.692123
		27.5	20.6333	1.08495	7.04725	19.885	36.5848	16.3041	0.44896	0.420696	0.723089
		31.5	21.6	3.02356	6.52794	22.7938	39.3216	19.7008	0.45895	0.437744	0.723613
		47.75	21.9667	10.3124	7.99322	31.5838	48.1293	28.1403	0.488902	0.482015	0.66144
		51.25	22.7	10.8813	7.55142	31.8791	49.7484	29.9296	0.471778	0.467216	0.62203
		54.75	23.1333	10.646	7.10079	33.7976	51.9604	31.5972	0.476724	0.474052	0.617308
		72.5	22.3333	8.71975	5.64769	38.9012	60.6829	37.2314	0.468073	0.471379	0.536568
		96.5	18.7667	6.06112	4.25245	45.9637	68.3144	41.6855	0.492407	0.499751	0.476308
		Fed-Batch Mock Hdrolysate: duplicate 2
		Time (h)	OD₆₀₀	Residual Glucose (g/L)	Residual Xylose (g/L)	Muconic acid (g/L)	Glucose Consumed (g/L)	Xylose Consumed (g/L)	MA yield (mol/mol)	MA yield(cmol/cmol)	Productivity (g/L/h)
		0	0.22	8.69863	5.55119	0	0	0	#DIV/0!	#DIV/0!	#DIV/0!
		4	3.16	8.60049	5.47383	0.0769106	0.167454	0.121599	0.311139	0.0128665	0.0192276
		8	5.46667	7.35638	4.68	0.832117	1.48199	0.960371	0.40043	0.107755	0.104015
		14.65	8.96667	4.60277	5.19224	4.65178	10.6502	4.39547	0.37032	0.263721	0.317528
		23.5	15.3667	1.9889	7.72484	14.4214	28.9783	11.5285	0.427039	0.384215	0.613677
		27.5	16.8	0.588602	6.37794	18.8556	35.2765	15.8882	0.439877	0.410916	0.685657
		31.5	17.2333	1.55404	5.09471	22.2717	39.1867	20.1719	0.445391	0.425559	0.707037
		47.75	15.6333	6.17534	4.96588	32.9162	51.934	30.9849	0.468256	0.465328	0.689344
		51.25	16.2667	6.3396	4.76724	34.778	54.2491	32.7092	0.471544	0.470529	0.678595
		54.75	16.7667	4.89873	3.50754	35.539	56.1647	34.2605	0.463152	0.463756	0.649114
		72.5	19.5333	0	0	43.5606	65.4617	40.472	0.484297	0.490698	0.600836
		96.5	17.8333	1.33829	0.514876	49.209	69.4722	43.247	0.514006	0.523186	0.509938

## Sheet: Fig. 6
	150-L Fed Batch: KH083
	Time (h)	OD₆₀₀	Residual Glucose (g/L)	Residual Xylose (g/L)	Muconic acid (g/L)	Glucose Consumed (g/L)	Xylose Consumed (g/L)	MA yield (mol/mol)	MA yield(cmol/cmol)	Productivity (g/L/h)
	0	1.29	58.7484	30.7749	0.479626	0	0	0	0	0
	6	5.24	59.5965	30.7226	0.879158	0	0	0	0.182952	0.146526
	9.5	5.9	49.9233	25.7817	1.7446	0	5.05393	0.147388	0.104125	0.183642
	25	21	38.0959	20.9456	8.45453	19.6311	9.29418	0.348171	0.297471	0.338181
	28	24.2	34.0796	19.3385	10.1091	23.4336	10.7893	0.352267	0.310292	0.36104
	32	23.8	29.5997	16.7523	12.7639	27.5629	13.1918	0.3729	0.338585	0.39887
	49	26.5	12.1993	5.79163	21.8025	43.7181	23.5002	0.384324	0.373003	0.444949
	53	27.4	11.9844	5.21071	22.8864	50.4749	27.3558	0.348299	0.342545	0.431819
	56.9	26.2	13.382	5.45714	24.1504	51.4203	28.2869	0.358655	0.353547	0.424436
	73.5	28.7	18.8548	6.55241	28.0972	52.7476	30.5812	0.398232	0.39521	0.382275
	80.75	28.4	18.2792	5.64973	29.3053	55.3475	32.4942	0.393802	0.39263	0.362914
	101.5	32.5	14.7193	4.15936	33.654	63.0163	36.0297	0.401541	0.403426	0.331567
	0.5-L Fed Batch: KH083 duplicate 1
	Time (h)	OD₆₀₀	Residual Glucose (g/L)	Residual Xylose (g/L)	Muconic acid (g/L)	Glucose Consumed (g/L)	Xylose Consumed (g/L)	MA yield (mol/mol)	MA yield(cmol/cmol)	Productivity (g/L/h)
	0	0.8	58.7119	30.2132	0	0	0	0	0	0
	4	4.31	57.479	29.1423	0.359833	0	0	0.139409	0.0443172	0.0899583
	8	6	55.1469	27.8694	1.55511	0	5.05393	0.249647	0.134356	0.194388
	20.3333	13.5	35.0424	20.9476	10.6408	19.6311	9.29418	0.405291	0.349117	0.523319
	23.8333	15.6	25.6103	17.4717	14.4382	23.4336	10.7893	0.393506	0.357698	0.605797
	28.8333	18.1	14.0954	12.5381	20.1205	27.5629	13.1918	0.403468	0.381381	0.69782
	46	16.8	31.1192	16.3492	28.4203	43.7181	23.5002	0.397269	0.392154	0.617832
	49.3333	17.2	28.7859	14.1958	29.0633	50.4749	27.3558	0.383542	0.380588	0.589121
	52.3333	16.6	26.809	12.5071	30.2251	51.4203	28.2869	0.381174	0.379658	0.57755
	71	16.9	22.9628	7.63561	35.9926	52.7476	30.5812	0.404777	0.407711	0.506938
	76	15.8	22.5117	6.85996	36.6989	55.3475	32.4942	0.402331	0.405979	0.48288
	0.5-L Fed Batch: KH083 duplicate 2
	Time (h)	OD₆₀₀	Residual Glucose (g/L)	Residual Xylose (g/L)	Muconic acid (g/L)	Glucose Consumed (g/L)	Xylose Consumed (g/L)	MA yield (mol/mol)	MA yield(cmol/cmol)	Productivity (g/L/h)
	0	0.82	55.5652	28.8539	0	0	0	0	0	0
	4	4.56	55.2288	27.9417	0.393735	0.779128	1.1421	0.232381	0.0542376	0.0984338
	8	5.6	54.1748	27.1723	1.6704	2.28303	2.14509	0.436321	0.179971	0.2088
	20.3333	13.7	31.3808	19.6032	10.5665	23.1075	8.69157	0.399732	0.344712	0.519664
	23.8333	15.7	22.8386	16.8665	14.4835	31.4394	11.319	0.408144	0.368822	0.607697
	28.8333	17.8	11.3155	12.122	19.8545	42.3409	15.7407	0.411398	0.387151	0.688594
	46	16.6	23.0941	12.8589	28.3134	55.9143	27.6213	0.403345	0.397635	0.615508
	49.3333	16.8	21.0152	11.0141	29.6023	58.2539	29.5997	0.400508	0.396677	0.600046
	52.3333	16.1	19.3152	9.71425	30.2133	60.2164	31.0341	0.393323	0.390752	0.577323
	71	14.7	16.809	6.09778	35.0091	63.8514	35.2002	0.418664	0.419759	0.493086
	76	14.9	16.7529	5.74192	35.3645	65.8611	36.5379	0.408979	0.410842	0.465322
	98.5	14.8	15.3285	3.92773	36.8198	67.8237	38.6275	0.409138	0.412284	0.373805

## Sheet: Fig. 7
Figure 7
Figure 7b (raw data)
MSPs of adipic acid and muconic acid ($/kg)
Reference	Adipic acid	Muconic acid
Bentley et al. (2020)	4.69	4.54
Ling et al. (2022)	4.03	3.86
0% CSL	3.49	3.31
1% CSL	3.09	2.91
5% CSL	2.88	2.7
10% CSL	2.92	2.73
Figure 7c (raw data)
Breakdown of MSP for the baseline case (5% v/v addition of CSL) with varying sugar production methods
Product	Mixed sugars source	Feedstock	Ammonium hydroxide	Sulfuric acid	Nutrients	Ethanol	Hydrogen	Utilities	Waste disposal	Capital charges	Fixed cost	Power export	Total
Adipic acid	DMR	1.411	0.163	0.096	0.042	0.005	0.048	0.11	0.043	0.778	0.183	0	2.879
	DDA	1.288	0.163	0.096	0.042	0.005	0.047	0.126	0.043	0.795	0.188	0	2.793
	DA	1.118	0.162	0.096	0.042	0.005	0.047	0.142	0.043	0.778	0.178	-0.008	2.603
Muconic acid	DMR	1.455	0.168	0.099	0.044	0	0	0.095	0.044	0.631	0.163	0	2.699
	DDA	1.328	0.168	0.099	0.043	0	0	0.103	0.045	0.647	0.168	0	2.601
	DA	1.153	0.168	0.099	0.044	0	0	0.062	0.044	0.635	0.159	-0.014	2.35
Figure 7d (raw data)
GHG emissions of adipic acid and muconic acid (kg CO2eq/kg)
Reference	Adipic acid	Muconic acid	Fossil-based adipic acid
Bentley et al. (2020)	2.7	1.9	9.4
Ling et al. (2022)	2.1	1.3
0% CSL	1.9	1.1
1% CSL	1.9	1
5% CSL	2	1.3
10% CSL	2.6	1.8
Figure 7e (raw data)
Breakdown of GHG emissions for the baseline case (5% v/v addition of CSL) with varying sugar production methods
Product	Mixed sugars source	Feedstock	Sulfuric acid	Ammonia	Corn steep liquior	Diammonium phosphate	Ethanol	Hydrogen	Ammonium hydroxide	Electricity	Natural Gas	Carbon uptake	Total
Adipic acid	DMR	1.03	0.03	0.02	0.39	0.09	0.01	0.28	0.84	0.63	0.49	-1.81	2
	DDA	0.64	0.03	0.02	0.39	0.09	0.01	0.28	0.84	0.68	0.57	-1.81	1.74
	DA	0.49	0.03	0.02	0.39	0.09	0.01	0.28	0.84	0.32	0.57	-1.81	1.23
Muconic acid	DMR	1.07	0.03	0.02	0.41	0.09	0	0	0.87	0.58	0	-1.81	1.26
	DDA	0.66	0.03	0.02	0.4	0.09	0	0	0.87	0.63	0	-1.81	0.89
	DA	0.5	0.03	0.02	0.41	0.09	0	0	0.87	0.25	0	-1.81	0.36

## Sheet: Fig. 8
Figure 8
Figure 8a (raw data)
Delta in MSP in comparison to the baseline ($/kg adipic acid)
Yield (0.51 mol/mol) Low: 0.60; high: 0.26	-0.12	1.801
Sulfate recovery (no) Low: yes	-0.331	0.656
Titer (47.2 g/L) Low: 100; high: 40	-0.333	-
Rate (0.49 g/L/h) Low: 2; high: 0.2	-0.097	0.025
Figure 8b (raw data)
Delta in GHG emissions in comparison to the baseline (kg CO2eq/kg adipic acid)
Yield (0.51 mol/mol) Low: 0.60; high: 0.26	-0.27	1.937
Sulfate recovery (no) Low: yes	-0.452	-
Titer (47.2 g/L) Low: 100; high: 40	-0.128	0.037
Rate (0.49 g/L/h) Low: 2; high: 0.2	-0.0053	0.031
