# Supplementary material for: Bioprocess development and scale-up for cis,cis-muconic acid production from glucose and xylose by Pseudomonas putida
Source: Royal Society of Chemistry journal article supplement (doi:10.1039/d4gc03424d), 2024-01-01
Supplement: d4gc03424d2.xlsx [file d4gc03424d2.xlsx]

## Sheet: PFD sugars
	Simplified PFD of biorefineries producing mixed sugars from corn stover

## Sheet: DMR sugars
DMR sugars		Stream number
	Units	1	2	3	4	5	6	7	8a	8b
Temperature	C	25	83.3266	48	38.0178	29.0389	24.5698	92.2629	37.2428	28.3183
Pressure	atm	1	8.30327	1	1	1.74026	1	1	1.03402	1.03954
Mass Flows	kg/hr	104167	295961	303467	419602	7505.8	44859.3	188214	16298.8	32605.5
Water	kg/hr	20833.3	236747	239116	373798	7081.07	26311.6	155333	523.669	21525.6
Glucose	kg/hr	0	168.859	27770.5	26382	0	1388.53	1.35482e-07	3.31654e-22	5.50973e-10
Xylose	kg/hr	0	0	15048.8	14296.4	0	752.441	0	0	0
Arabinose	kg/hr	0	0	1066.92	1013.58	0	53.3462	0	0	0
Cellobiose	kg/hr	0	0	359.2	341.24	0	17.96	0	0	0
Sucrose	kg/hr	641.667	0	0	0	0	0	320.833	0	28.875
Glucose olygomers	kg/hr	0	0	1928.34	1831.92	0	96.417	0	0	0
Xylose olygomers	kg/hr	0	0	1012.11	961.508	0	50.6057	0	0	0
Arabinose olygomers	kg/hr	0	0	88.3425	83.9254	0	4.41712	0	0	0
Biomass extractives	kg/hr	12208.3	0	0	0	0	0	12208.3	2.98808e-11	49.7838
Soluble lignin	kg/hr	0	527.89	527.89	501.495	0	26.3945	2573.84	0	0
HMF	kg/hr	0	118.136	118.136	112.229	0	5.9068	0.0651486	8.41052e-08	0.000265641
Lactic acid	kg/hr	0	0	22.0844	20.9802	22.0844	1.10422	0	0	0
NH4SO4	kg/hr	0	112.291	112.291	101.075	0	11.2157	0	0	0
Ammonium acetate	kg/hr	0	76.9175	76.9175	69.2349	0	7.68257	0	0	0
Sodium hydroxide	kg/hr	0	0	0	0	0	0	2000	0	32.7041
OIL	kg/hr	0	0	7.24611	6.88381	7.24611	0.362306	0	0	0
CO2	kg/hr	0	0	0.462826	0.416599	0.462826	0.00626673	0	11452.1	4.14414
CH4	kg/hr	0	0	0	0	0	0	0	4320.24	0.0686994
Cellulose	kg/hr	29204.9	28357.9	1247.75	6.23875	0	1241.51	846.942	0	846.942
Galactan	kg/hr	1191.53	1004.46	1004.46	5.02228	0	999.434	187.07	0	187.07
Mannan	kg/hr	499.941	499.941	499.941	2.4997	0	497.441	0	0	0
Xylan	kg/hr	16273.1	14255.2	0	0	0	0	2017.86	0	2017.86
Arabinan	kg/hr	1983.1	1027.25	0	0	0	0	955.854	0	955.854
Lignin	kg/hr	13131.8	10030.1	10030.1	50.1503	0	9979.9	0	0	0
Acetate	kg/hr	1508.16	0	0	0	0	0	1447.83	0	5.90403
Protein	kg/hr	2583.03	2583.03	2605.34	13.0267	22.3083	2592.31	0	0	0
Ash	kg/hr	4107.85	451.863	451.863	2.25932	0	449.604	3655.98	0	3655.98
Enzyme	kg/hr	0	0	282.514	1.41257	282.514	281.101	0	0	0
Denaturant	kg/hr	0	0	31.3905	0.156953	31.3905	31.2336	0	0	0
Cell biomass	kg/hr	0	0	58.4782	0.292391	58.4782	58.1858	0	0	1695.51
NASO4	kg/hr	0	0	0	0	0	0	0	2.61712e-44	1598.8
NA2CO3	kg/hr	0	0	0	0	0	0	6666.67	0	0

## Sheet: DDA sugars
DDA sugars		Stream number
	Units	1	2	3	4	5	6	7	8a	8b
Temperature	C	25	84.5725	48	37.1255	29.0821	24.5578	83.6898	37.4385	28.0983
Pressure	atm	1	7.6714	1	1	1.72595	1	1	1.03402	1.075
Mass Flows	kg/hr	104167	326105	333278	479963	7173.35	56649.1	199569	16674.9	15107.7
Water	kg/hr	20833.3	260562	264963	434495	6767.43	33802	177257	546.472	9618.9
Glucose	kg/hr	0	2310.54	25799	24509	0	1289.95	0.000166598	3.85579e-19	2.2731e-07
Galactose	kg/hr	0	1179.61	1179.61	1120.63	0	58.9803	8.59128e-05	1.98791e-19	1.17221e-07
Mannose	kg/hr	0	494.94	494.94	470.193	0	24.747	3.60473e-05	8.34087e-20	4.91838e-08
Xylose	kg/hr	0	14229.5	14229.5	13518.1	0	711.477	0.00535286	5.21201e-14	7.30357e-06
Arabinose	kg/hr	0	1907.47	1907.47	1812.1	0	95.3736	0.0007248	7.05728e-15	9.88935e-07
Cellobiose	kg/hr	0	0	343.293	326.128	0	17.1647	0	0	0
Sucrose	kg/hr	641.667	0	0	0	0	0	320.833	0	28.875
Glucose olygomers	kg/hr	0	87.6146	1171.7	1113.11	0	58.585	6.0665e-06	1.40371e-20	8.27728e-09
Galactose olygomers	kg/hr	0	28.5966	28.5966	27.1668	0	1.42983	1.98005e-06	4.58268e-21	2.70163e-09
Mannose olygomers	kg/hr	0	11.9986	11.9986	11.3987	0	0.599929	8.3079e-07	0	7.47711e-08
Xylose olygomers	kg/hr	0	371.024	371.024	352.472	0	18.5512	0.000139571	1.3593e-15	1.90435e-07
Arabinose olygomers	kg/hr	0	42.8346	42.8346	40.6929	0	2.14173	1.61135e-05	0	1.45022e-06
Biomass extractives	kg/hr	12208.3	0	0	0	0	0	12208.3	2.82509e-11	16.6573
Soluble lignin	kg/hr	0	525.207	525.207	498.947	0	26.2604	2626.42	0	0
HMF	kg/hr	0	189.725	189.725	180.238	0	9.48623	0.56764	8.08396e-07	0.000774489
Furfural	kg/hr	0	282.309	282.309	268.194	0	14.1011	312.305	0.940463	0.411816
Acetic acid	kg/hr	0	0	0	0	0	0	6.89391	0.00119796	0.009388
Lactic acid	kg/hr	0	0	21.1064	20.0511	21.1064	1.05532	0	0	0
NH4SO4	kg/hr	0	1010.55	1010.55	893.257	0	117.288	0	0	0
Ammonium acetate	kg/hr	0	223.454	223.454	197.519	0	25.9351	0	0	0
Sodium hydroxide	kg/hr	0	0	0	0	0	0	1416.67	0	13.4858
Oil	kg/hr	0	0	6.92524	6.57897	6.92524	0.346262	0	0	0
CO2	kg/hr	0	0	0.442326	0.390988	0.442326	0.00862334	0	11695.2	1.57634
CH4	kg/hr	0	0	0	0	0	0	0	4428.79	0.0256623
Cellulose	kg/hr	29204.9	27102.1	4553.16	22.7658	0	4530.39	0	0	0
Galactan	kg/hr	1191.53	86.9814	86.9814	0.434907	0	86.5465	0	0	0
Mannan	kg/hr	499.941	36.4957	36.4957	0.182478	0	36.3132	0	0	0
Xylan	kg/hr	16273.1	1793.29	1793.29	8.96646	0	1784.33	813.654	0	813.654
Arabinan	kg/hr	1983.1	1.78479	1.78479	0.00892394	0	1.77587	198.31	0	198.31
Lignin	kg/hr	13131.8	9980.15	9980.15	49.9008	0	9930.25	0	0	0
Acetate	kg/hr	1508.16	0	0	0	0	0	1327.18	0	1.81083
Protein	kg/hr	2583.03	2583.03	2604.35	13.0217	21.3202	2591.33	0	0	0
Ash	kg/hr	4107.85	1026.96	1026.96	5.13481	0	1021.83	3080.89	0	3080.89
Enzyme	kg/hr	0	0	270.003	1.35002	270.003	268.653	0	0	0
Denaturant	kg/hr	0	0	30.0002	0.150001	30.0002	29.8502	0	0	0
Cell biomass	kg/hr	0	0	55.8885	0.279443	55.8885	55.6091	0	0	1205.93
Tar	kg/hr	0	36.182	36.182	0.18091	0	36.0011	0	0	0
NASO4	kg/hr	0	0	0	0	0	0	0	5.1817e-45	127.038

## Sheet: DA sugars
DA sugars		Stream number
	Units	1	2	3	4	5	6	7	8a	8b
Temperature	C	25	25	48	38.3533	28.6128	24.6214	99.6287	38.1464	27.3526
Pressure	atm	1	1	1	1	1.923	1	1	1.03402	3.82613
Mass Flows	kg/hr	104167	104167	450173	613622	13790.1	63140.5	40493.8	715.354	220.269
Water	kg/hr	20833.3	20833.3	358912	548611	13009.8	36889.5	39965.1	24.4671	183.624
Glucose	kg/hr	0	0	29600.9	28120.9	0	1480.05	0.000375734	1.82057e-19	3.04815e-08
Galactose	kg/hr	0	0	1179.61	1120.63	0	58.9803	0.000126103	6.10866e-20	1.02301e-08
Mannose	kg/hr	0	0	494.94	470.193	0	24.747	5.29102e-05	2.56308e-20	4.29236e-09
Xylose	kg/hr	0	0	16642.7	15810.6	0	832.137	0.00860387	1.62284e-14	6.97992e-07
Arabinose	kg/hr	0	0	2007.87	1907.47	0	100.393	0.0010485	1.97765e-15	8.506e-08
Cellobiose	kg/hr	0	0	329.976	313.477	0	16.4988	0	0	0
Sucrose	kg/hr	641.667	641.667	0	0	0	0	0	0	0
Glucose olygomers	kg/hr	0	0	1129.64	1073.16	0	56.4822	9.26677e-06	4.48901e-21	7.5177e-10
Galactose olygomers	kg/hr	0	0	28.5966	27.1668	0	1.42983	3.02459e-06	1.46552e-21	2.45371e-10
Mannose olygomers	kg/hr	0	0	11.9986	11.3987	0	0.599929	1.26906e-06	0	1.14215e-07
Xylose olygomers	kg/hr	0	0	390.551	371.023	0	19.5276	0.000201905	3.80912e-16	1.63796e-08
Arabinose olygomers	kg/hr	0	0	47.594	45.2143	0	2.3797	2.46049e-05	0	2.21444e-06
Biomass extractives	kg/hr	12208.3	12208.3	12208.3	11597.9	0	610.417	0.00129205	6.25948e-19	1.04818e-07
Soluble lignin	kg/hr	0	0	656.495	623.67	0	32.8247	0.0942905	0	0
HMF	kg/hr	0	0	384.638	365.406	0	19.2319	1.20908	3.48261e-07	9.80864e-05
Furfural	kg/hr	0	0	468.532	445.106	0	23.406	527.264	0.322976	0.042313
Lactic acid	kg/hr	0	0	40.5752	38.5464	40.5752	2.02876	0	0	0
NH4SO4	kg/hr	0	0	2806.99	2541.53	0	265.462	0	0	0
Oil	kg/hr	0	0	13.3128	12.6472	13.3128	0.66564	0	0	0
CO2	kg/hr	0	0	0.850332	0.769915	0.850332	0.0145561	0	499.594	0.0198345
CH4	kg/hr	0	0	0	0	0	0	0	190.049	0.000328869
Cellulose	kg/hr	29204.9	29204.9	1250.44	6.25218	0	1244.18	0	0	0
Galactan	kg/hr	1191.53	1191.53	78.6407	0.393204	0	78.2475	0	0	0
Mannan	kg/hr	499.941	499.941	32.9961	0.16498	0	32.8311	0	0	0
Xylan	kg/hr	16273.1	16273.1	16.2731	0.0813654	0	16.1917	0	0	0
Arabinan	kg/hr	1983.1	1983.1	1.9831	0.00991549	0	1.97318	0	0	0
Lignin	kg/hr	13131.8	13131.8	12475.2	62.376	0	12412.8	0	0	0
Acetate	kg/hr	1508.16	1508.16	1508.16	7.54078	0	1500.61	0	0	0
Protein	kg/hr	2583.03	2583.03	2624.01	13.1201	40.9858	2610.89	0	0	0
Ash	kg/hr	4107.85	4107.85	4107.85	20.5392	0	4087.31	0	0	0
Enzyme	kg/hr	0	0	519.057	2.59529	519.057	516.462	0	0	0
Denaturant	kg/hr	0	0	57.6732	0.288366	57.6732	57.3849	0	0	0
Cell biomass	kg/hr	0	0	107.441	0.537204	107.441	106.904	0	0	35.3607
Tar	kg/hr	0	0	37.1961	0.18598	0	37.0101	0	0	0

## Sheet: PFD AA
	Simplified PFD of biorefineries producing adipic acid from mixed sugars

## Sheet: AA-DMR-5%
Adipic acid from DMR sugars with 5% (v/v) CSL addition
		Stream number
	Units	1	2	3	4	5	6	7	8	9	10	11	12	13
Temperature	C	25	25	25	25	38.8925	25	25	15	25	462.196	25	99.6891	15
Pressure	atm	1	1	1	1	1	1	1	1	1	35	1	31	1
Mass Flows	kg/hr	4471.91	419602	65847.3	7986.04	362520	2501.04	14577.6	14015	88.9103	98909.1	426.35	98460.4	14450.5
Water	kg/hr	1776.67	373798	1289.66	0	327492	0	1020.43	0	0	0	0	0	0
Ethanol	kg/hr	0	0.000252626	0	0	0.000185622	0	0	0	88.9103	84089.9	0	84038.9	37.9279
Glucose	kg/hr	0	26382	0	0	0	0	0	0	0	0	0	0	0
Xylose	kg/hr	0	14296.4	0	0	0	0	0	0	0	0	0	0	0
Arabinose	kg/hr	0	1013.58	0	0	0	0	0	0	0	0	0	0	0
Cellobiose	kg/hr	0	341.24	0	0	341.244	0	0	0	0	0	0	0	0
Glucose olygomers	kg/hr	0	1831.92	0	0	1831.94	0	0	0	0	0	0	0	0
Xylose olygomers	kg/hr	0	961.508	0	0	961.519	0	0	0	0	0	0	0	0
Arabinose olygomers	kg/hr	0	83.9254	0	0	83.9263	0	0	0	0	0	0	0	0
Soluble lignin	kg/hr	0	501.495	0	0	501.453	0	0	0	0	0	0	0	0
HMF	kg/hr	0	112.229	0	0	111.911	0	0	0	0	0	0	0	0
Lactic acid	kg/hr	875.074	20.9802	0	0	20.9607	0	0	0	0	0	0	0	0
NH3	kg/hr	117.091	0.10372	0	0	4.26961	0	0	0	0	0	0	0	0
H2SO4	kg/hr	0	0	0	0	0	0	13557.1	0	0	0	0	0	0
NH4SO4	kg/hr	0	101.075	0	0	101.076	0	0	0	0	0	0	0	0
Ammonium acetate	kg/hr	0	69.2349	0	0	69.2357	0	0	0	0	0	0	0	0
Diammonium phosphate	kg/hr	819.168	0	0	0	0	0	0	0	0	0	0	0	0
Oil	kg/hr	0	6.88381	0	0	6.88388	0	0	0	0	0	0	0	0
O2	kg/hr	0	0.0406169	15036.6	0	0.361132	0	0	0	0	0	0	0	0
N2	kg/hr	0	0.0853095	49521	0	5.49445	0	0	0	0	0	0	0	0
CO2	kg/hr	0	0.416599	0	0	79.3718	0	0	0	0	0	0	0	0
SO2	kg/hr	0	0.00105717	0	0	0.000552915	0	0	0	0	0	0	0	0
Cellulose	kg/hr	0	6.23875	0	0	6.23882	0	0	0	0	0	0	0	0
Galactan	kg/hr	0	5.02228	0	0	5.02234	0	0	0	0	0	0	0	0
Mannan	kg/hr	0	2.4997	0	0	2.49973	0	0	0	0	0	0	0	0
Lignin	kg/hr	0	50.1503	0	0	50.1508	0	0	0	0	0	0	0	0
Protein	kg/hr	883.913	13.0267	0	0	13.0268	0	0	0	0	0	0	0	0
Ash	kg/hr	0	2.25932	0	0	2.25934	0	0	0	0	0	0	0	0
Enzyme	kg/hr	0	1.41257	0	0	1.41259	0	0	0	0	0	0	0	0
Denaturant	kg/hr	0	0.156953	0	0	0.156954	0	0	0	0	0	0	0	0
H2	kg/hr	0	0	0	0	0	0	0	0	0	406.558	426.35	8.79084	0
Cell biomass	kg/hr	0	0	0	0	9586.73	0	0	0	0	0	0	0	0
Muconic acid	kg/hr	0	0	0	0	2176.77	0	0	14015	0	0	0	0	0
Adipic acid	kg/hr	0	0	0	0	0	0	0	0	0	14412.6	0	14412.6	14412.6
NH4OH	kg/hr	0	0	0	7986.04	798.604	2501.04	0	0	0	0	0	0	0
NH42SO4	kg/hr	0	0	0	0	18265.3	0	0	0	0	0	0	0	0
